# Supplementary material for: Lactobacillus spp. reduces ethanol-induced liver oxidative stress and inflammation in a mouse model of alcoholic steatohepatitis
Source: PubMed Central journal article supplement — Exp Ther Med. 2021 Jan 7;21(3):188. doi: 10.3892/etm.2021.9619 (PMC7812587; doi:10.3892/etm.2021.9619), 2021-01-07

Figure S1. Evaluation of tolerance of potential human oral probiotics to gastric acid and bile. (A) TSP05, (B) TSF331 and (C) TSR332 were incubated with MRS broth (pH 3.5) for 3 h and with 0.3% bile for an additional 4 h. TSP05, *Lactobacillus plantarum*; TSF331, *Lactobacillus fermentum*; TSR332, *Lactobacillus reuteri*; CFU, colony forming unit; MRS, de Man, Rogosa, and Sharpe.

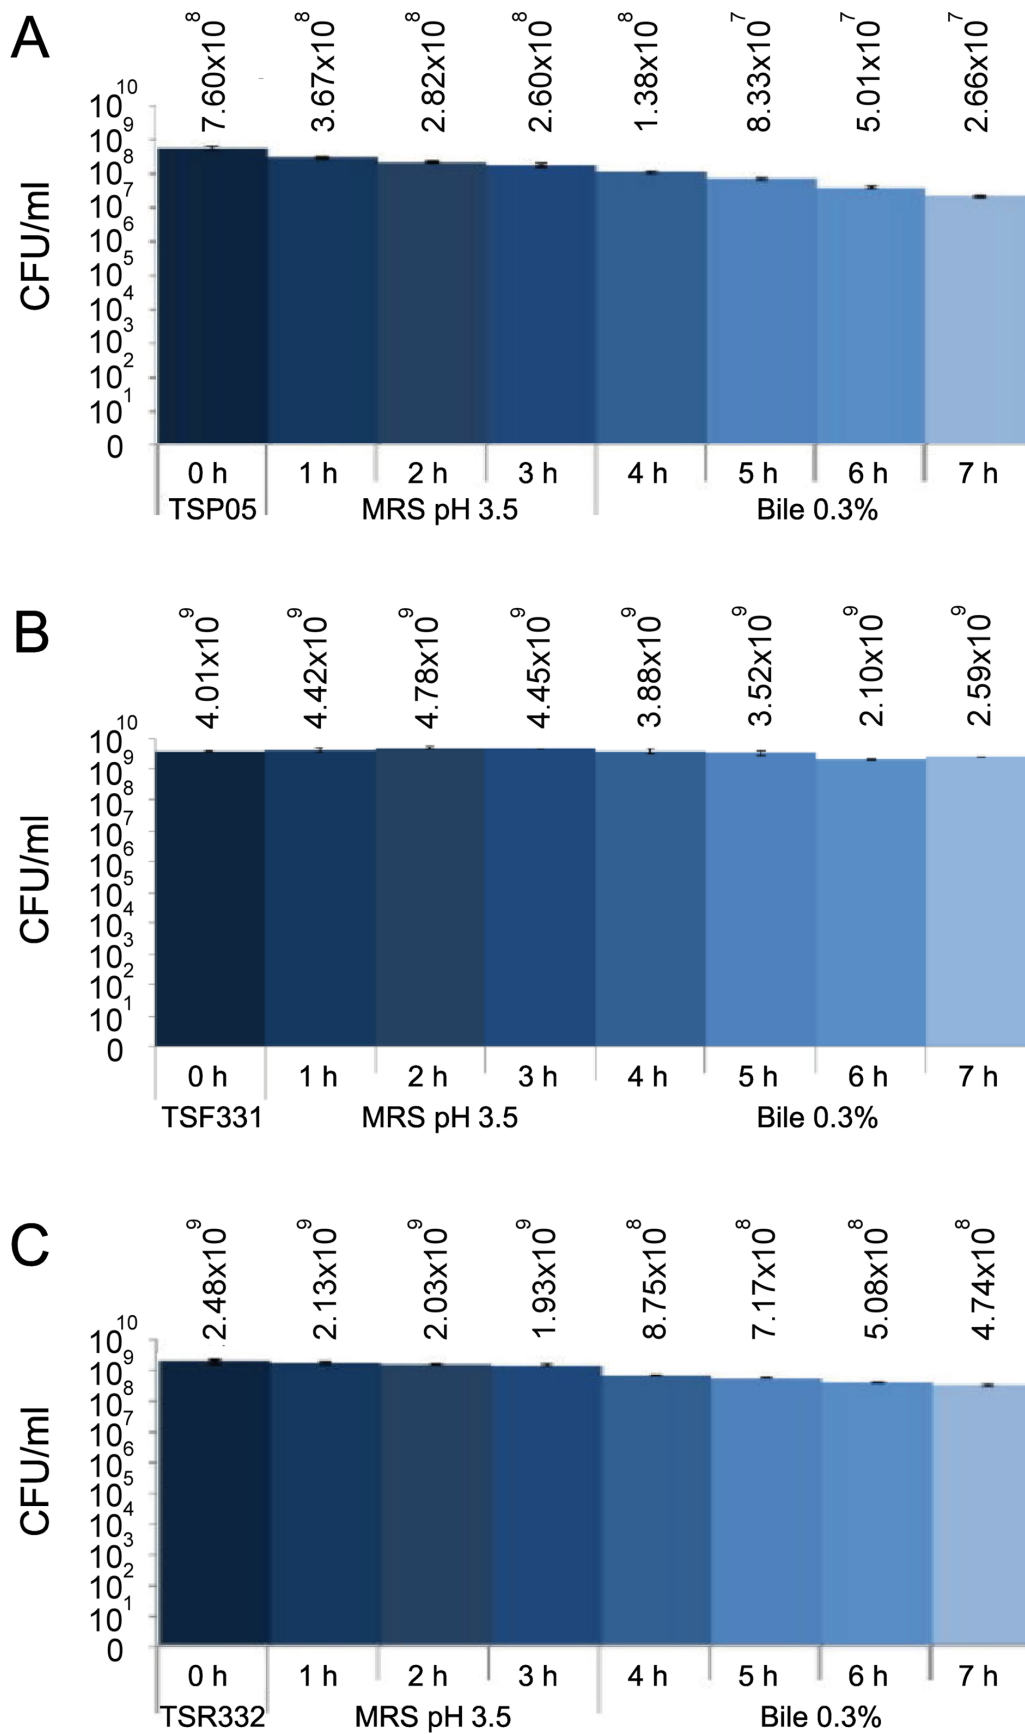

Figure S2. Gram staining of probiotics adhered to Caco-2 cells *in vitro*. (A) Adhesion levels of the probiotics in the intestine at 4 h. (B) Image of the TSP05 adhesion in the intestine. (C) Image of the TSF331 adhesion in the intestine. (D) Image of the TSR333 adhesion in the intestine. Magnification, x1,000. TSP05, *Lactobacillus plantarum*; TSF331, *Lactobacillus fermentum*; TSR332, *Lactobacillus reuteri*; CFU, colony forming unit.

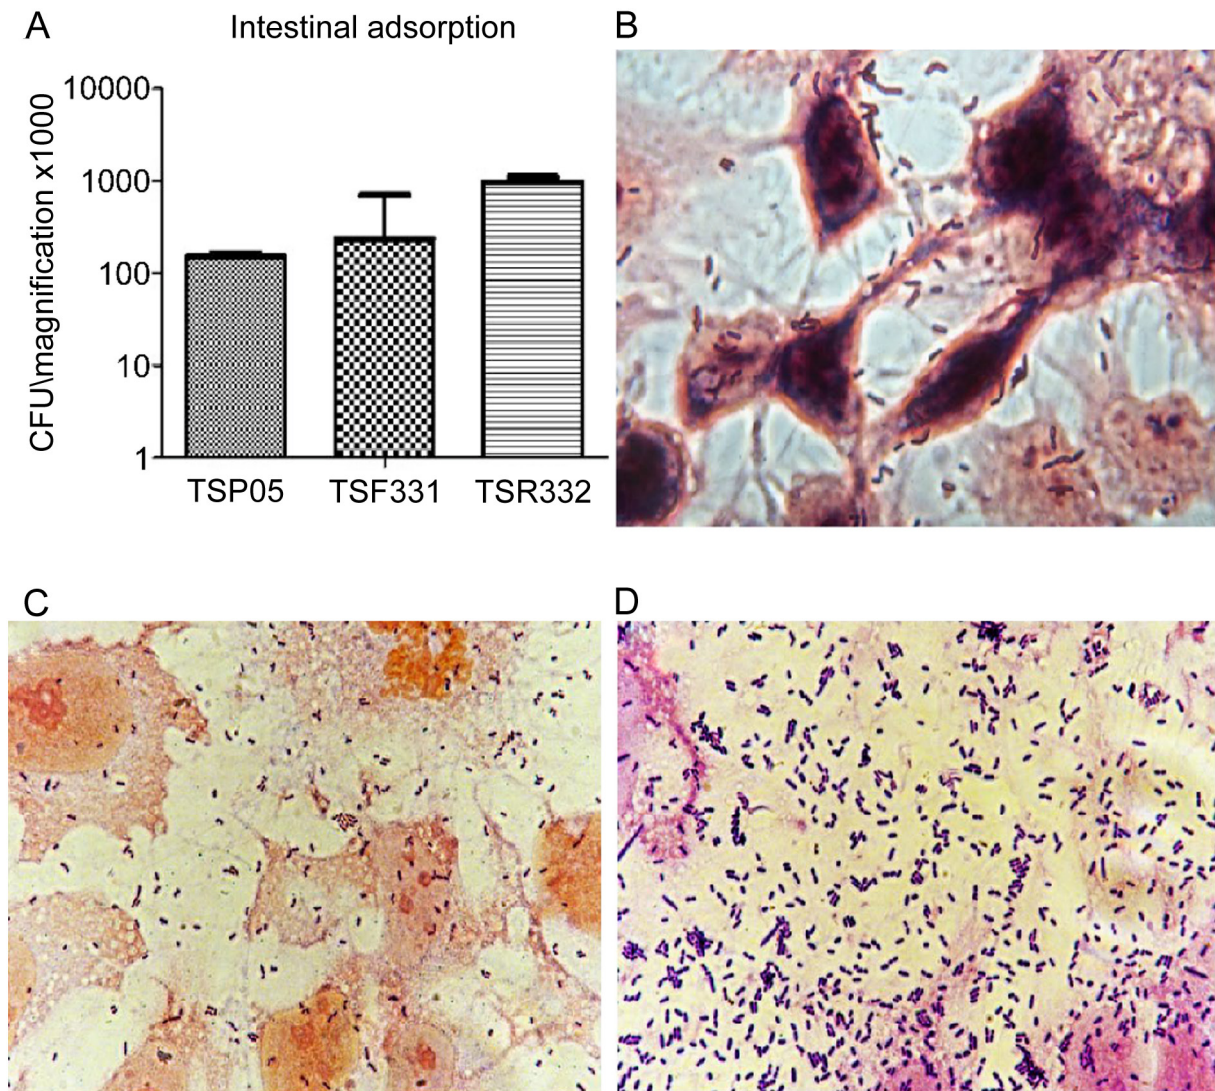

Supplement: Supplementary_Data.pdf [file Supplementary_Data.pdf]
